# Supplementary material
Source: PubMed Central journal article supplement (PMC2650329)
Supplement: 0809594106_0809594106SI.pdf [file 0809594106_0809594106SI.pdf]

# Supporting Information

Flachsbart *et al.* 10.1073/pnas.0809594106

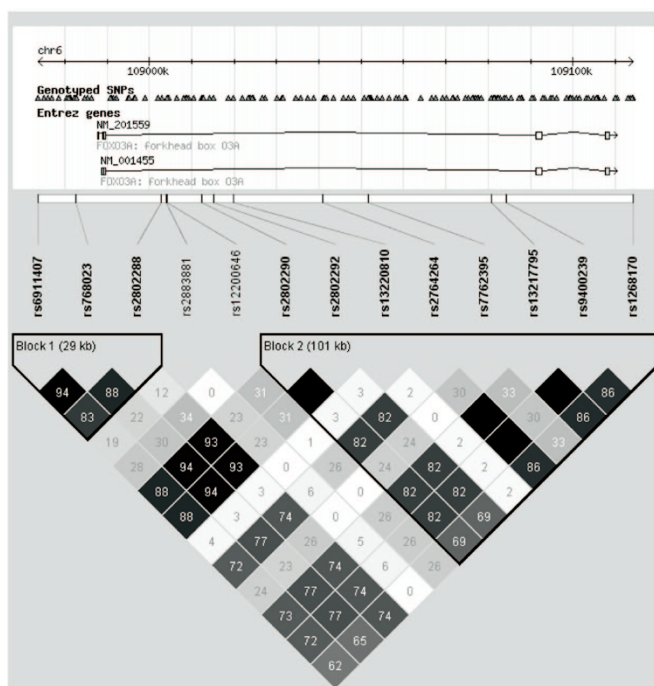

(A)

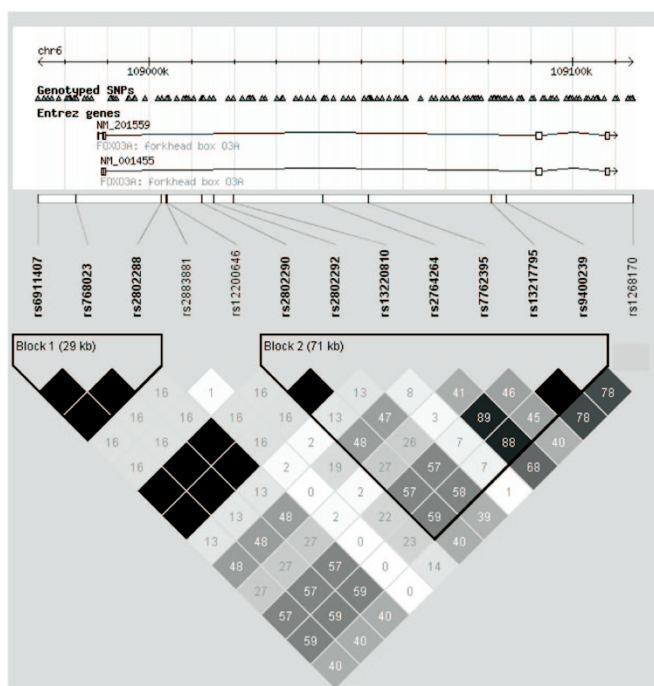

(B)

Fig. S1. LD structure of the *FOXO3A* gene (SNPs genotyped in the German, Dutch, and Japanese samples) according to JPT (A) and CEU HapMap (B) data.
